# Supplementary material
Source: publisher figshare collection journal article supplement (https://plos.figshare.com/articles/dataset/_/6464042)
Supplement: Supplementary file [file 1]

**S3 Table. Description of model fit indices and thresholds used in evaluating scale development results**

| Model Fit Indices                                  | Description                                                                                                                                                                                                                                                                    | Thresholds used in this study                                                                                                                                                                                                                                                                                                                        | References    |
|----------------------------------------------------|--------------------------------------------------------------------------------------------------------------------------------------------------------------------------------------------------------------------------------------------------------------------------------|------------------------------------------------------------------------------------------------------------------------------------------------------------------------------------------------------------------------------------------------------------------------------------------------------------------------------------------------------|---------------|
| Chi-square test                                    | The chi-square value is a test statistic of the goodness of fit of a factor model. It compares the observed covariance matrix with a theoretically proposed covariance matrix.                                                                                                 | Chi-square test of model fit has been assessed to be overly sensitive to sample size and to vary when dealing with non-normal variables. Hence, the use of a non-normal data, a small sample size (180-300) and highly correlated items make the chi-square approximation inaccurate. We do not refer to this index for model fitness in this study. | [74, 61]      |
| Root Mean Square of Error of Approximation (RMSEA) | RMSEA estimates “the difference between the examined model and a hypothetical model where every component in the model is related to every other component” [75:3]. The RMSEA is considered as a “badness-of-fit index where a value of zero indicates the best fit” [74:205]. | Browne and Cudeck have suggested that $RMSEA \leq 0.05$ may indicate a good fit. Range should be $0 \leq RMSEA \leq 0.10$ .                                                                                                                                                                                                                          | [74,75,79,80] |
| Tucker Lewis Index (TLI)                           | TLI is based on the idea of comparing the proposed factor model to a model in which no interrelationships at all are assumed among any of the items.                                                                                                                           | Bentler and Bonnett suggest that models with overall fit indices of less than 0.90 are generally inadequate and can be improved substantially. Hu and Bentler recommend $TLI \geq 0.95$ . This study used $TFI \geq 0.95$ .                                                                                                                          | [76, 77]      |
| Comparative Fit Index (CFI)                        | CFI is an incremental relative fit index that "measures the relative improvement in the fit of [a] researcher's model over that of a baseline model".                                                                                                                          | This study used $CFI \geq 0.95$ for 'an acceptable fit'                                                                                                                                                                                                                                                                                              | [74,76]       |
| Standardized Root Mean Square Residual (SRMR)      | SRMR is a measure of the mean absolute correlation residual, the overall difference between the observed and predicted correlations.                                                                                                                                           | Threshold for acceptable model fit is $SRMR \leq 0.08$ .                                                                                                                                                                                                                                                                                             | [71,74,76,78] |

**S3 Table. Description of model fit indices and thresholds used in evaluating scale development results**

| Model Fit Indices                         | Description                                                                                                                                                                                                                            | Thresholds used in this study                                                                          | References |
|-------------------------------------------|----------------------------------------------------------------------------------------------------------------------------------------------------------------------------------------------------------------------------------------|--------------------------------------------------------------------------------------------------------|------------|
| Weighted Root Mean Square Residual (WRMR) | WRMR uses “a variance-weighted approach specially suited for models whose variables measured on different scales or have widely unequal variances”; It has been assessed to be most suitable in assessing models from non-normal data. | Threshold for assessing WRMR should be <1.0. This index is used only for confirmatory factor analysis. | [61,75]    |
| Standard of Reliability for scales        | Nunnally suggests that in making important decisions on scales a reliability of 0.90 is the minimum threshold that should be tolerated while a reliability of 0.95 should be the desirable standard                                    | Threshold for assessing internal consistency for scales should be $\geq 0.90$                          | [92,101]   |
