# Supplementary material
Source: publisher figshare collection journal article supplement (https://plos.figshare.com/articles/dataset/_/6464042)

**S1 Fig. Integration of Delphi Method with Focus Group Discussions**

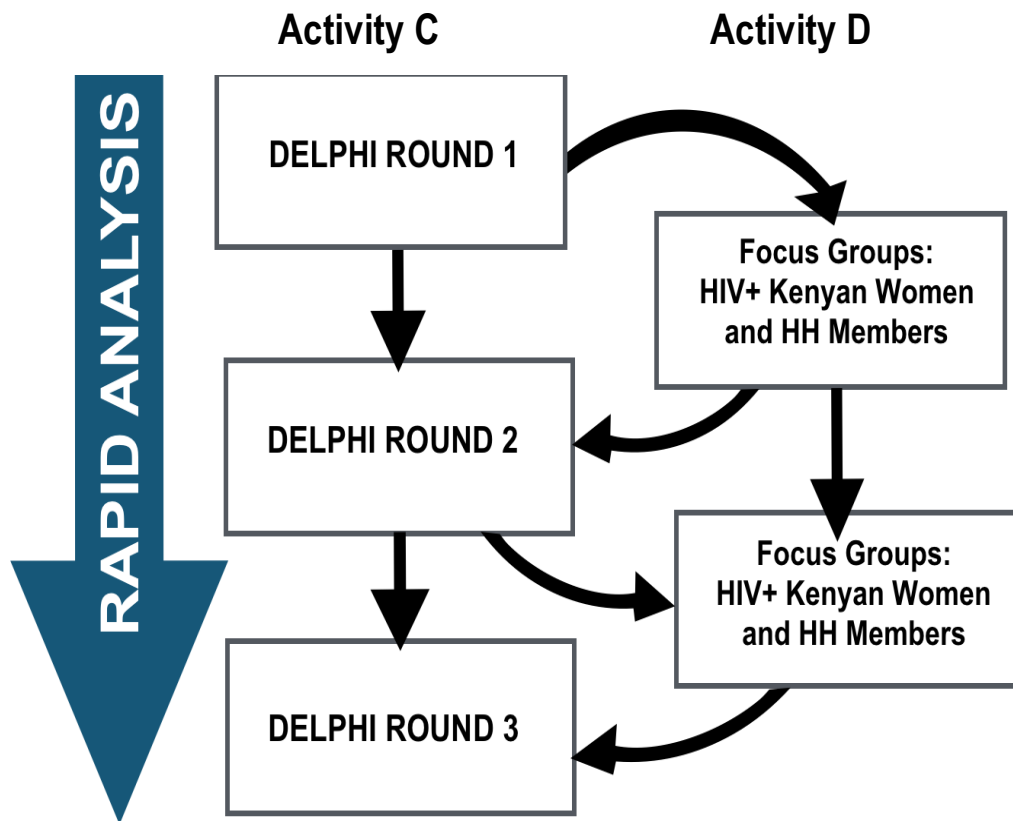

Supplement: Supplementary file [file 1]
