# Supplementary material
Source: publisher figshare collection journal article supplement (https://plos.figshare.com/articles/dataset/_/6464042)

**S3 Fig. Scree plot showing cut-off point for retained scale factors using parallel analysis**

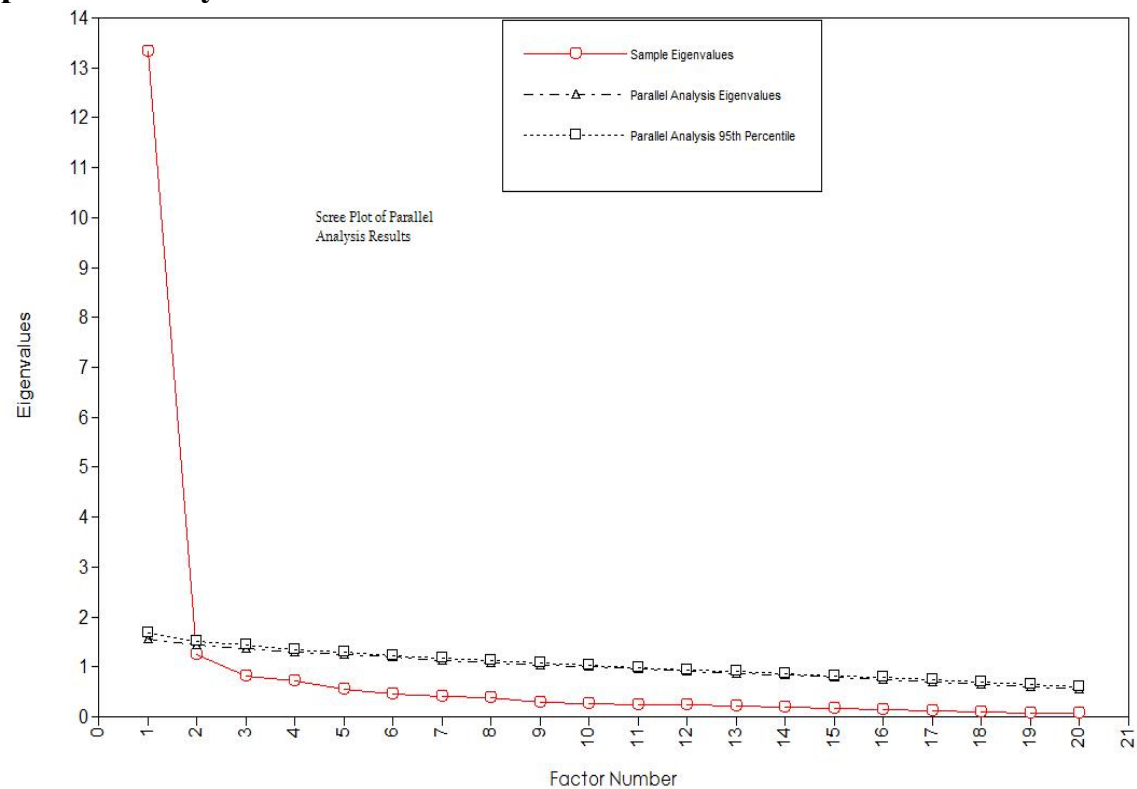

Supplement: Supplementary file [file 1]
